# Supplementary material for: Perovskenes: two-dimensional perovskite-type monolayer materials predicted by first-principles calculations
Source: Royal Society of Chemistry journal article supplement (doi:10.1039/d3cp04435a), 2023-11-20
Supplement: d3cp04435a1.pdf [file d3cp04435a1.pdf]

## **Perovskenes: Two-dimensional perovskite-type monolayer materials predicted by first-principles calculations (Supplementary)**

Mosayeb Naseri<sup>1,2\*</sup>, Shirin Amirian<sup>2</sup>, Mehrdad Faraji<sup>3</sup>, Mohammad Abdur Rashid<sup>4</sup>, Maicon Pierre Lourenço<sup>5</sup>,  
Venkataraman Thangadurai<sup>6</sup>, D.R. Salahub<sup>1\*</sup>

<sup>1</sup>Department of Chemistry, Department of Physics and Astronomy, CMS – Center for Molecular Simulation, IQST –  
Institute for Quantum Science and Technology, Quantum Alberta, University of Calgary, 2500 University Drive  
NW, Calgary, Alberta, Canada, T2N 1N4

<sup>2</sup>Department of Physics, Kermanshah Branch, Islamic Azad University, Kermanshah, Iran

<sup>3</sup>Micro and Nanotechnology Graduate Program, TOBB University of Economics and Technology, Sogutozu  
Caddesi No 43 Sogutozu, 06560 Ankara, Turkey

<sup>4</sup>Department of Physics, Jashore University of Science and Technology, Jashore 7408, Bangladesh

<sup>5</sup>Departamento de Química e Física – Centro de Ciências Exatas, Naturais e da Saúde – CCENS – Universidade  
Federal do Espírito Santo, Alegre, Espírito Santo, Brazil

<sup>6</sup>Department of Chemistry, University of Calgary, Calgary, Alberta T2N 1N4, Canada

\*To whom correspondence should be addressed.

Email addresses: [mosayeb.naseri@ucalgary.ca](mailto:mosayeb.naseri@ucalgary.ca) (M. Naseri) [dsalahub@ucalgary.ca](mailto:dsalahub@ucalgary.ca) (D.R. Salahub)

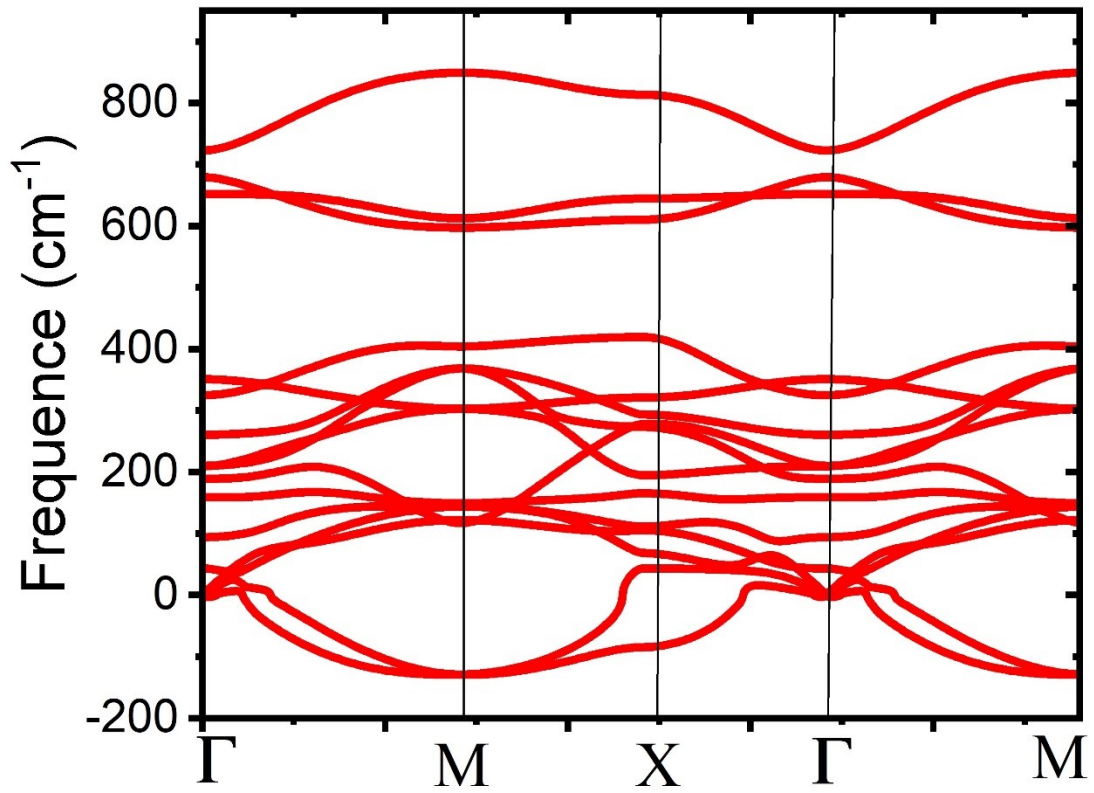

Figure S1: Phonon dispersion modes for 2D SrZrO3 monolayer.

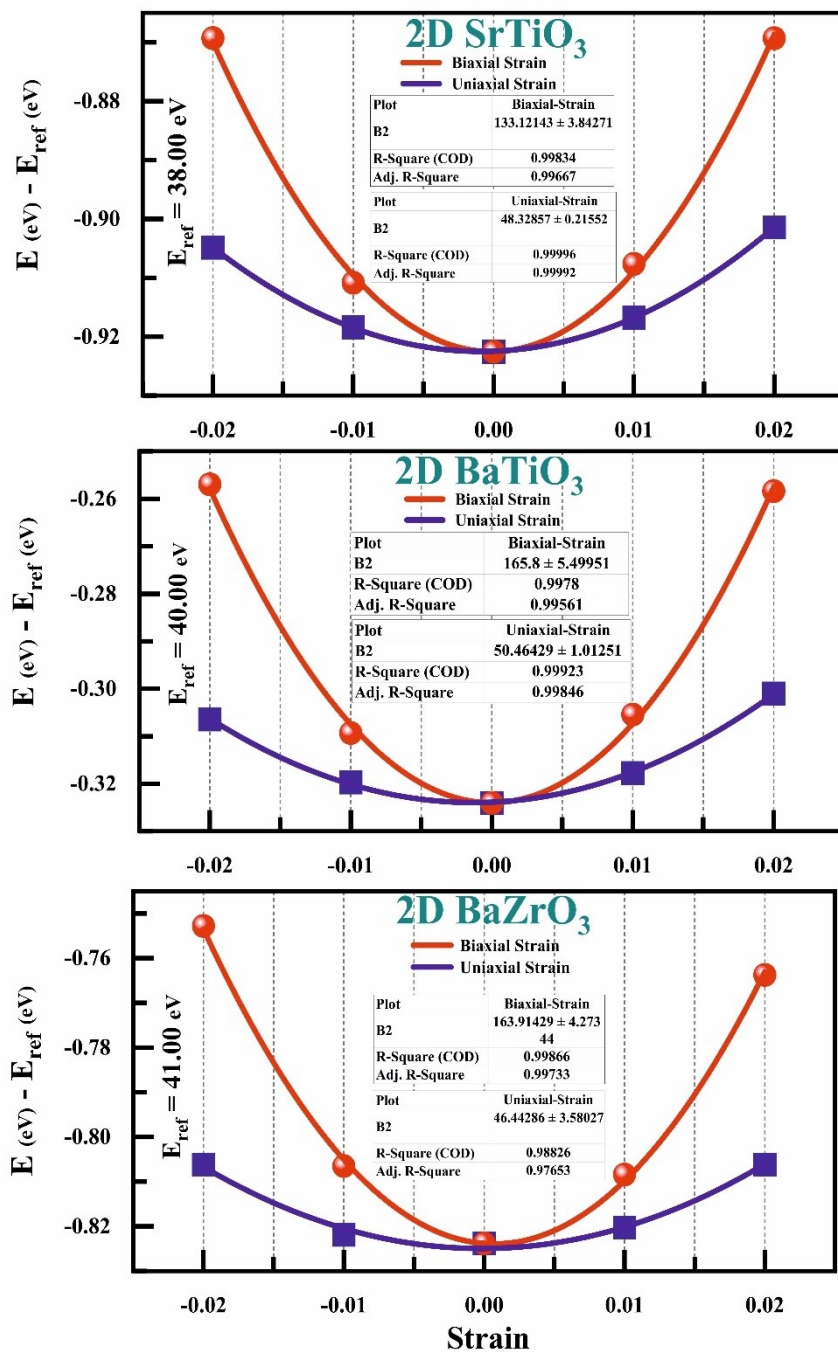

Figure S2: The variation of strain energy of the 2D SrTiO3, BaZrO3 and BaTiO3 monolayers under biaxial and uniaxial strains.

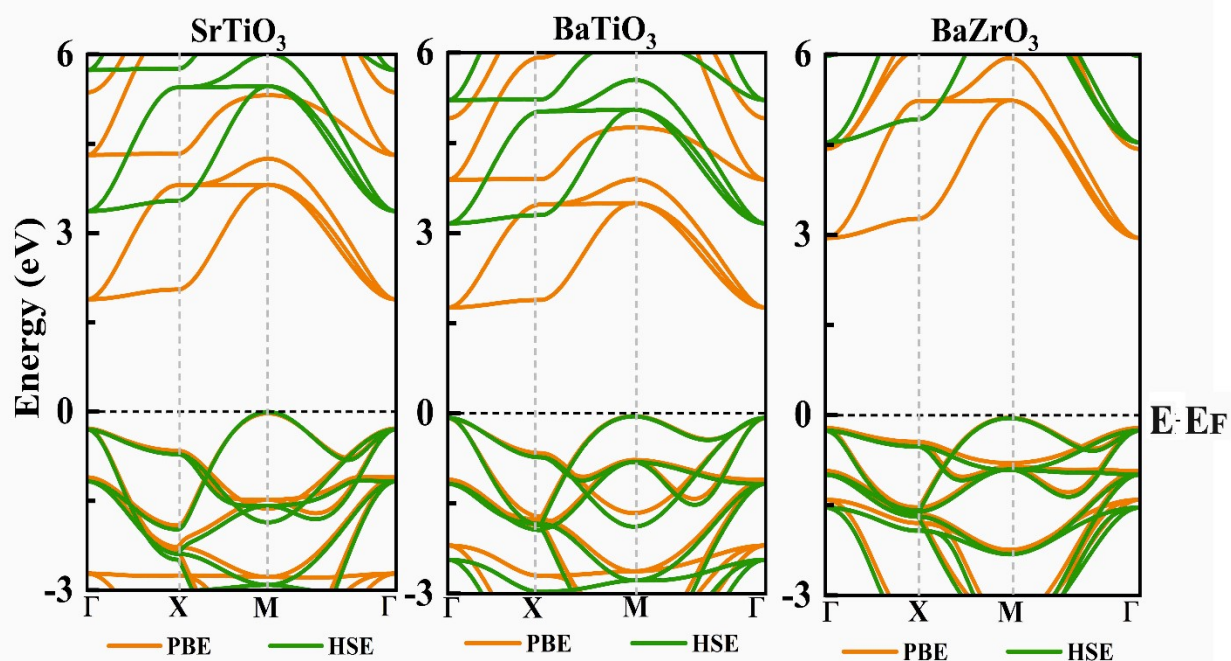

Figure S3: Band structures for  $\text{SrTiO}_3$ ,  $\text{BaTiO}_3$  and  $\text{BaZrO}_3$  perovskites calculated by PBE and HSE06 levels of theory.
